## Systematic Reviews

*A systematic review is a balanced review and analysis of the literature on a scientific or medical topic related to diabetes. A systematic review provides the scientific rationale for a position statement and undergoes critical peer review prior to Professional Practice Committee (PPC) approval. Effective January 2010, technical reports were replaced with systematic reviews, for which a priori search and inclusion/*

*exclusion criteria are developed and published. Listed below are recent reviews.*

**Macronutrients, Food Groups, and Eating Patterns in the Management of Diabetes: A Systematic Review of the Literature, 2010**

Madelyn L. Wheeler, Stephanie A. Dunbar, Lindsay M. Jaacks, Wahida Karmally, Elizabeth J. Mayer-Davis,

Judith Wylie-Rosett, and William S. Yancy Jr.  
*Diabetes Care* 35:434–445, 2012

**Cost-Effectiveness of Interventions to Prevent and Control Diabetes Mellitus: A Systematic Review**

Rui Li, Ping Zhang, Lawrence E. Barker, Farah M. Chowdhury, and Xuanping Zhang  
*Diabetes Care* 33:1872–1894, 2010
